# Supplementary material
Source: publisher figshare collection journal article supplement (https://tandf.figshare.com/articles/dataset/_/5084686)
Supplement: Supplementary file 1 [file 1]

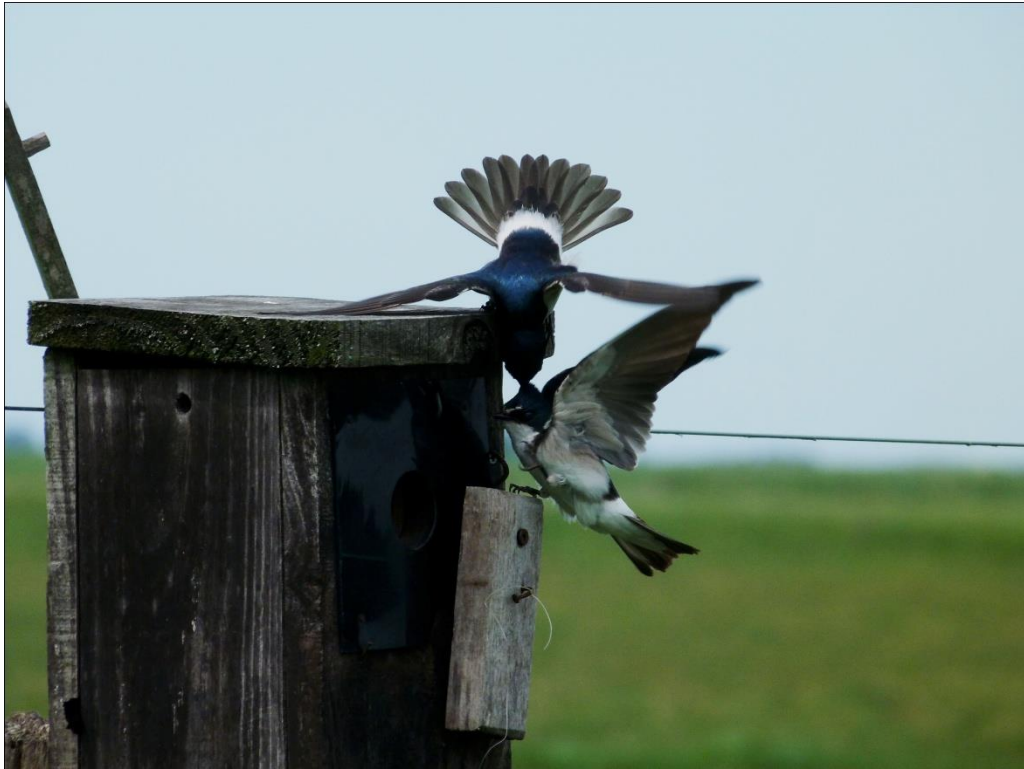

**Figure S1.** White-rumped swallows *Tachycineta leucorrhoa* guard and fiercely defend their chosen nest-boxes from intruders, including conspecifics, at the onset of the breeding season in Chascomús, Argentina (Photograph by María Milagros Jefferies).
