# Supplementary material
Source: publisher figshare collection journal article supplement (https://tandf.figshare.com/articles/dataset/_/5084686)
Supplement: Supplementary file 2 [file 1]

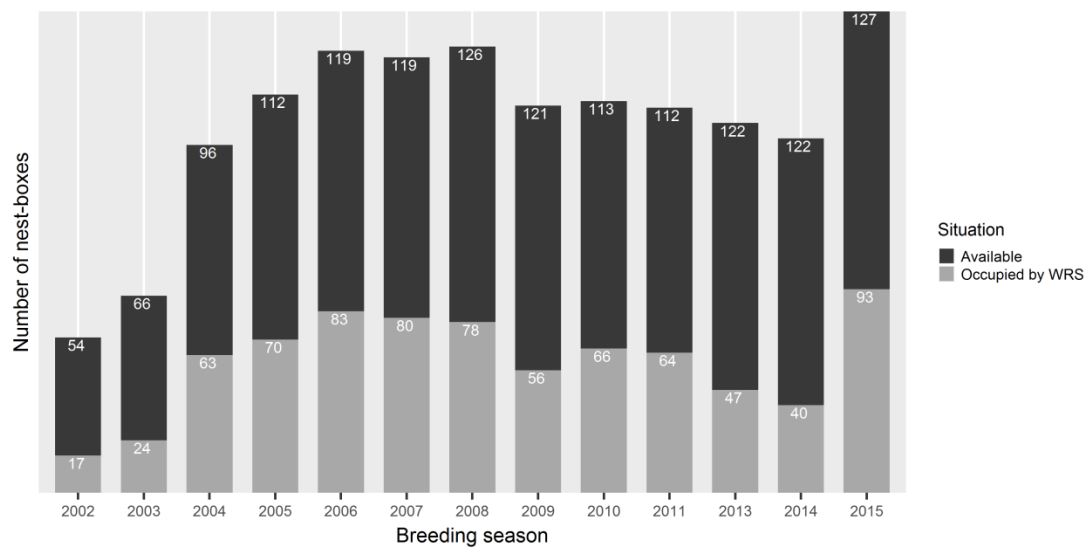

**Figure S2.** Number of nest-boxes available per season, and those effectively occupied by breeding White-rumped swallows in Chascomús, Argentina, between 2002 and 2015.
