# Supplementary material
Source: publisher figshare collection journal article supplement (https://tandf.figshare.com/articles/dataset/_/5084686)
Supplement: Supplementary file 3 [file 1]

**Table S1.** Outcomes of top (lowest AIC) general linear mixed models (binomial error distribution, logit link function) explaining variation in nest-box and mate choices in white-rumped swallows breeding in Chascomús, Argentina, between 2003 and 2015. Random effects were individual identity nested within calendar year, and calendar year alone. Number of parameters ( $K$ ), Akaike's Information Criterion corrected for small sample size ( $AICc$ ) and  $AICc$  weights ( $W_i$ ) are given for each model. Standardised coefficient estimates  $\pm$  standard errors (SE) are given for all predictors included in the models. No effect estimates are given when the best model was the null model. Significance codes are: '\*\*\*'  $P < 0.001$ , '\*\*'  $P < 0.01$ .

| Dataset     | $n$ | Response        | Predictors        | $K$ | $AICc$ | $W_i$ | $d.f.$ | Estimate $\pm$ SE | $Z$   | $P$ -value |
|-------------|-----|-----------------|-------------------|-----|--------|-------|--------|-------------------|-------|------------|
| (a) Females | 241 | Nest-box choice | intercept         | 4   | 332.5  | 0.54  | 236    | 0.00 $\pm$ 0.00   | 0.00  | -          |
|             |     |                 | No. of fledglings |     |        |       | 236    | 0.32 $\pm$ 0.12   | 2.57  | 0.009**    |
| (b) Males   | 104 | Nest-box choice | intercept         | 3   | 148.6  | 0.54  | 100    | 0.00 $\pm$ 0.00   | 0.00  | -          |
| (c) Females | 92  | Nest-box choice | intercept         | 5   | 117.5  | 0.25  | 86     | 0.00 $\pm$ 0.00   | 0.00  | -          |
|             |     |                 | No. of fledglings |     |        |       | 86     | 0.31 $\pm$ 0.18   | -1.11 | 0.005**    |
|             |     |                 | Divorce           |     |        |       | 86     | -1.40 $\pm$ 0.50  | -2.79 | 0.267      |
| (d) Males   | 96  | Nest-box choice | intercept         | 5   | 109.8  | 0.91  | 90     | 0.00 $\pm$ 0.00   | 0.00  | -          |
|             |     |                 | No. of fledglings |     |        |       |        | 0.99 $\pm$ 1.32   | 0.75  | 0.453      |
|             |     |                 | Divorce           |     |        |       |        | -7.86 $\pm$ 2.23  | -3.51 | 0.000***   |

|                    |    |             |                |   |      |      |    |                  |      |        |
|--------------------|----|-------------|----------------|---|------|------|----|------------------|------|--------|
| <b>(e) Females</b> | 92 | Mate choice | intercept      | 3 | 54.2 | 1.00 | 88 | $0.00 \pm 0.00$  | 0.00 | -      |
| <b>(f) Males</b>   | 96 | Mate choice | intercept      | 4 | 93.1 | 0.63 | 91 | $0.00 \pm 0.00$  | 0.00 | -      |
|                    |    |             | Nest-box reuse |   |      |      |    | $-1.51 \pm 0.60$ | 2.50 | 0.012* |
